# Supplementary material
Source: Springer Nature journal article supplement (https://www.springermedizin.de/resource/supplementary/12879_2008_807_MOESM4_ESM.pdf/9449826)
Supplement: MOESM4 [file 9449826]

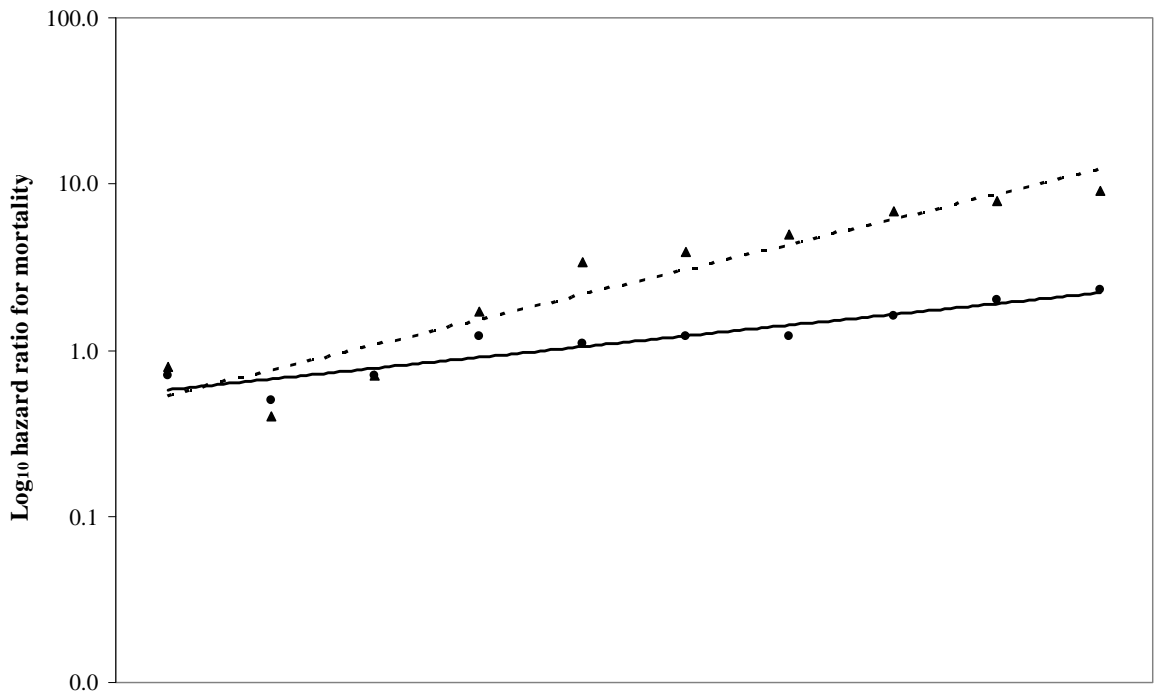

Days until antiretroviral therapy was initiated

▲ bacteriologic-confirmed TB

● all patients

- - - fitted line (bacteriologic-confirmed TB)

— fitted line (all patients)

| Days until ART was initiated    | 0-30 vs. >30 | 0-40 vs. >40 | 0-50 vs. >50 | 0-60 vs. >60 | 0-70 vs. >70 | 0-80 vs. >80 | 0-90 vs. >90 | 0-100 vs. >100 | 0-110 vs. >110 | 0-120 vs. >120 |
|---------------------------------|--------------|--------------|--------------|--------------|--------------|--------------|--------------|----------------|----------------|----------------|
| Log <sub>10</sub> hazard ratio* | -0.15        | -0.30        | -0.15        | 0.08         | 0.04         | 0.08         | 0.08         | 0.20           | 0.30           | 0.36           |
| 95% Lower CI                    | -0.70        | -1.00        | -0.70        | -0.52        | -0.52        | -0.52        | -0.52        | -0.40          | -0.30          | -0.22          |
| 95% Upper CI                    | 0.46         | 0.23         | 0.40         | 0.65         | 0.61         | 0.66         | 0.67         | 0.82           | 0.91           | 0.97           |
| Log <sub>10</sub> hazard ratio† | -0.10        | -0.40        | -0.15        | 0.23         | 0.53         | 0.59         | 0.70         | 0.84           | 0.90           | <b>0.95</b>    |
| 95% Lower CI                    | -1.00        | -1.00        | -1.00        | -0.52        | -0.40        | -0.30        | -0.22        | -0.10          | 0.00           | <b>0.04</b>    |
| 95% Upper CI                    | 0.93         | 0.49         | 0.70         | 1.04         | 1.43         | 1.48         | 1.58         | 1.76           | 1.80           | <b>1.86</b>    |
